# Supplementary material
Source: publisher figshare collection journal article supplement (https://gsajournals.figshare.com/ndownloader/files/28005663)
Supplement: Supplementary file 1 [file 28005663]

## Sheet: Sheet1
Table S1 Statistical significance for fertility data
Corresponds to data presented in Figure 2D. p values calculated using Student's t-test.
Experimental genotype	Control genotype	Time (days post eclosion)	p value	Annotation
w: +; D𝛽1∆ex5	w; +; +	4	4.90287e-07	***
		6	2.37553e-05	***
		8	1.19997e-05	***
		11	9.83661e-08	***
		13	1.67488e-08	***
		15	1.13883e-07	***
		19	3.64932e-06	***
		23	2.32653e-09	***
		27	3.03311e-07	***
		33	0.00110561	**
		40	0.113128	ns
		47	1	ns
elav-GAL4/w; sgRNAs/+; UAS-Cas9/+	elav-GAL4; sgRNAs; +	3	0.00193626	**
		5	0.0317558	*
		10	0.000173554	***
		13	0.00273058	**
		16	0.0268589	*
		19	0.0325898	*
		23	0.0495321	*
		29	0.0118947	*
		33	0.0114698	*
		36	0.122347	ns
		39	0.189052	ns
elav-GAL4/w; sgRNAs/+; UAS-Cas9/+	w; +; UAS-Cas9	3	0.00134716	**
		5	0.000274616	***
		10	0.00242705	**
		13	0.0254457	*
		16	0.0420913	*
		19	0.106734	ns
		23	0.971687	ns
		29	0.142429	ns
		33	1	ns
		36	1	ns
		39	1	ns
elav-GAL4/w; UAS-D𝛽1/+; D𝛽1∆ex5	elav-GAL4; +; D𝛽1∆ex5	3	7.63378e-05	***
		5	0.000272741	***
		8	3.01704e-06	***
		11	5.4589e-06	***
		14	0.000173097	***
		17	0.000139707	***
		20	0.0533616	ns
		23	0.259643	ns
		26	1	ns
		29	1	ns
		33	1	ns
		36	1	ns
		40	1	ns
elav-GAL4/w; UAS-D𝛽1/+; D𝛽1∆ex5	w; UAS-D𝛽1; D𝛽1∆ex5	3	0.000111137	***
		5	0.000339538	***
		8	4.71803e-05	***
		11	9.20278e-06	***
		14	0.000173097	***
		17	0.000139707	***
		20	0.0533616	ns
		23	0.259643	ns
		26	1	ns
		29	1	ns
		33	1	ns
		36	1	ns
		40	1	ns
w; UAS-D𝛽1/+; D𝛽1-TG4/D𝛽1∆ex5	w; +; D𝛽1-TG4/D𝛽1∆ex5	5	3.61929e-08	***
		7	2.07688e-10	***
		10	1.91358e-09	***
		13	5.33456e-08	***
		16	1.04611e-05	***
		20	3.55929e-08	***
		24	3.13179e-06	***
		27	6.08702e-06	***
		31	0.0831146	ns
		34	0.0666453	ns
		38	0.280336	ns
		42	0.355918	ns
		45	1	ns
